# Supplementary material for: CoMn phosphide encapsulated in nitrogen-doped graphene for electrocatalytic hydrogen evolution over a broad pH range
Source: Royal Society of Chemistry journal article supplement (doi:10.1039/d0cc07523j), 2021-01-01
Supplement: d0cc07523j1.pdf [file d0cc07523j1.pdf]

## **Electronic Supplementary Material (ESI)**

**CoMn phosphide encapsulated in nitrogen-doped graphene for  
electrocatalytic hydrogen evolution over a broad pH range**

## I. Material preparation

### Raw materials

Potassium hexacyanocobaltate, Manganese acetate ( $\text{Mn}(\text{CH}_3\text{COO})_2 \cdot \text{H}_2\text{O}$ ), Anhydrous ethanol were purchased from Shanghai Chemical Reagent Co. Ltd. The Pt was purchased from Pharmaceutical Group Co. Ltd. All prepared solutions are deionized water ( $18.2 \Omega \cdot \text{cm}^{-2}$  resistivity). All chemicals were of analytical grade and used as received without further purification.

### Synthesis of CoMn@NG and CoMn-P@NG

10 mL of 25 mM manganese acetate solution was used as solution A, and 1.5 g PVP was added. After stirring, 10 mL 25 mM cobalt potassium cyanide was added to solution A with a dropper, and leave to set at room temperature for 24 h to obtain a solid precipitate. After washing with distilled water and ethanol for several times, freeze-drying was used to produce off-white PB-CoMn colloids. PB-CoMn was then annealed in Ar gas at 600 °C for 1 h with a heating rate of 10 °C min<sup>-1</sup>, and the product was obtained. In order to obtain CoMn-P@NG, sodium hypophosphate and CoMn@NG were placed at both ends of the same crucible, and the part containing sodium hypophosphate was placed in the upper part of the gas in a tubular heating furnace. The part containing sodium hypophosphate was calcinated at 400 °C for 2 h in an argon atmosphere, and the heating rate was 5 °C min<sup>-1</sup>.

### Electrochemical measurements

1 mg CoMn-P@NG or CoMn@NG powder, 0.5 mg Ketjen black mix with 220 μL absolute ethanol and 60 μL deionized water, and add 10 μL Naftion solution. And then the electrocatalyst ink is prepared through ultrasonic dispersion in ice-water bath for 45 minutes. Drop 10 μL catalyst ink on the glass carbon electrode with a diameter of 4 mm with a load of 0.27 mg cm<sup>-2</sup>. 20 wt % Pt/C was prepared in the same manner. Drop 10 μL ink on the glass carbon electrode as a reference. Carbon rod was used as a counter electrode and a saturated Ag/AgCl electrode was used as a reference electrode in the three-electrode test system. Fast activation CV cycles were performed in 1 M KOH and 0.5 M H<sub>2</sub>SO<sub>4</sub> solution at the scan rate of 100 mV s<sup>-1</sup>. After the CV curves were stabilized, the test scanning rate of LSV was set to 2 mV s<sup>-1</sup>, and hydrogen evolution reaction tests were performed for 20 wt% Pt/C, CoMn@NG and CoMn-P@NG.

### Physical characterization

SEM images were taken from Zeiss scanning electron microscope. TEM and scanning transmission electron microscopy (STEM) were carried on an FEI Tecnai F20 transmission electron microscope at an accelerating voltage of 200 kV. XRD was performed on a PANalytical X-ray diffractometer. XPS spectra were collected on SSI S-Probe XPS Spectrometer. Raman spectrum of powder samples was recorded on Lab RAM HR Raman microscope with a laser excitation wavelength of 514 nm.

## Supplementary Experimental Figures

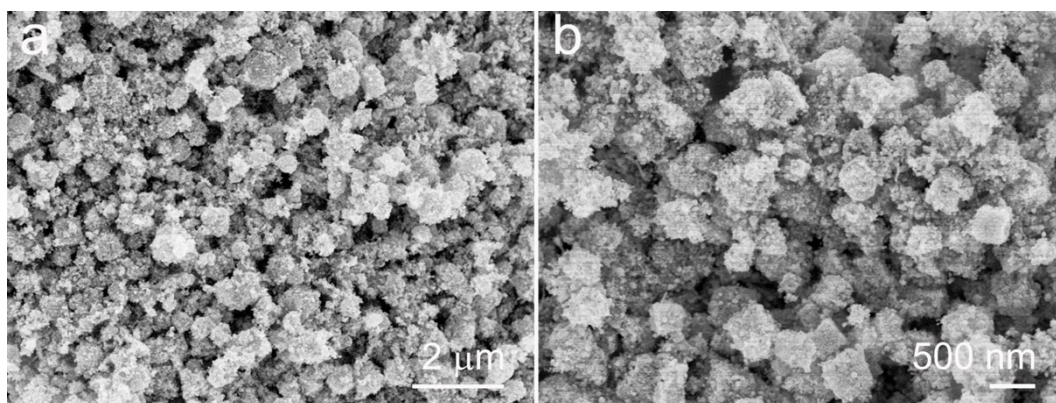

Figure S1 SEM image of CoMn@NG at (a) low magnification (b) high magnification.

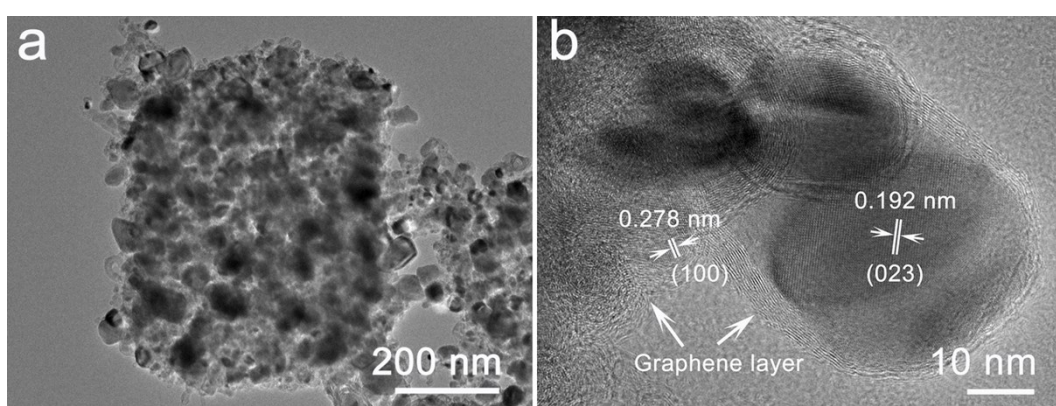

Figure S2 (a) TEM image of CoMn@NG. (b) HRTEM image of CoMn@NG. In the CoMn@NG structure, there are two lattices spacing of 0.16 nm and 0.278 nm inside the core, corresponding to the (100) plane of CoO (JCPDS No. 89-2803) and (023) plane of Co<sub>2</sub>Mn<sub>3</sub>O<sub>8</sub> (JCPDS No. 30-0446), and the outer layer is the graphene layer.

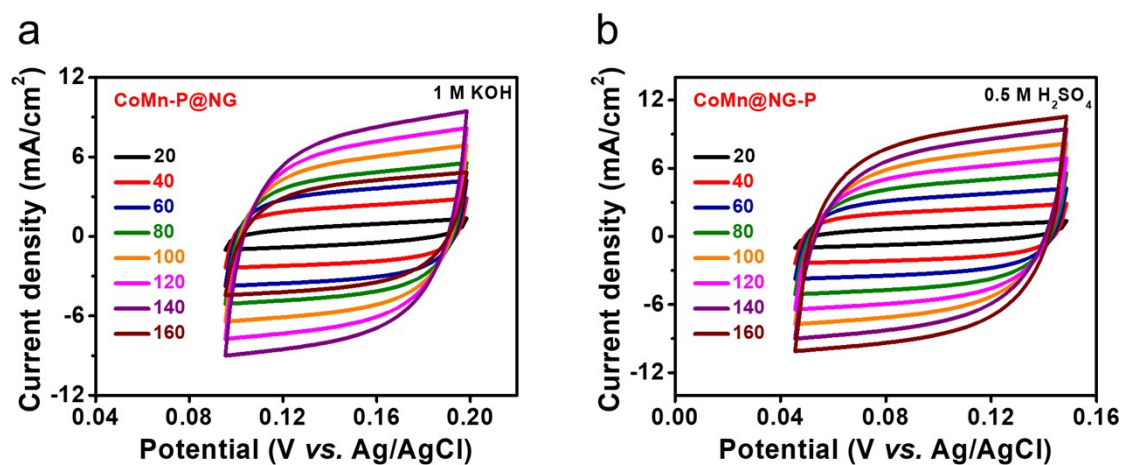

Figure S3 ECSA of CoMn-P@NG in (a) 1 M KOH (b) 0.5 M H<sub>2</sub>SO<sub>4</sub>.

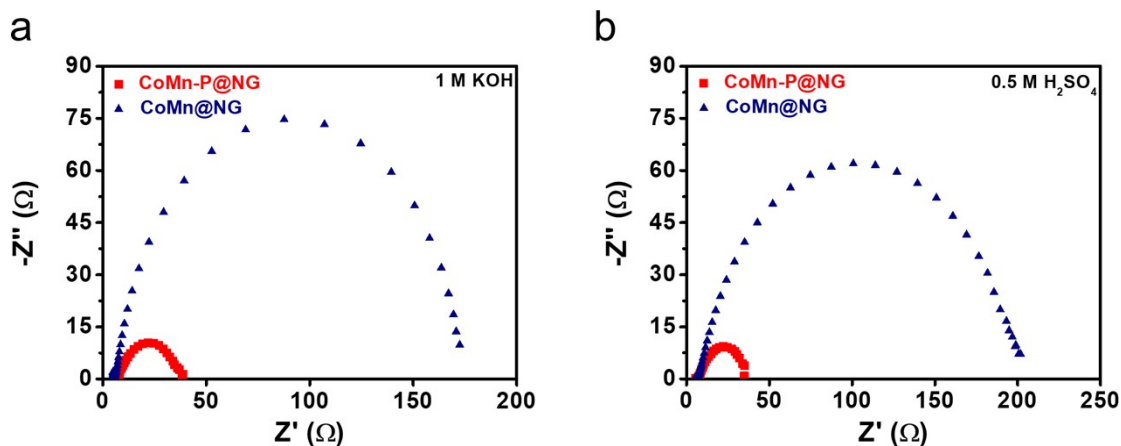

Figure S4 EIS curves of CoMn@NG, CoMn-P@NG and Pt/C in (a) 1 M KOH (b) 0.5 M H<sub>2</sub>SO<sub>4</sub>.

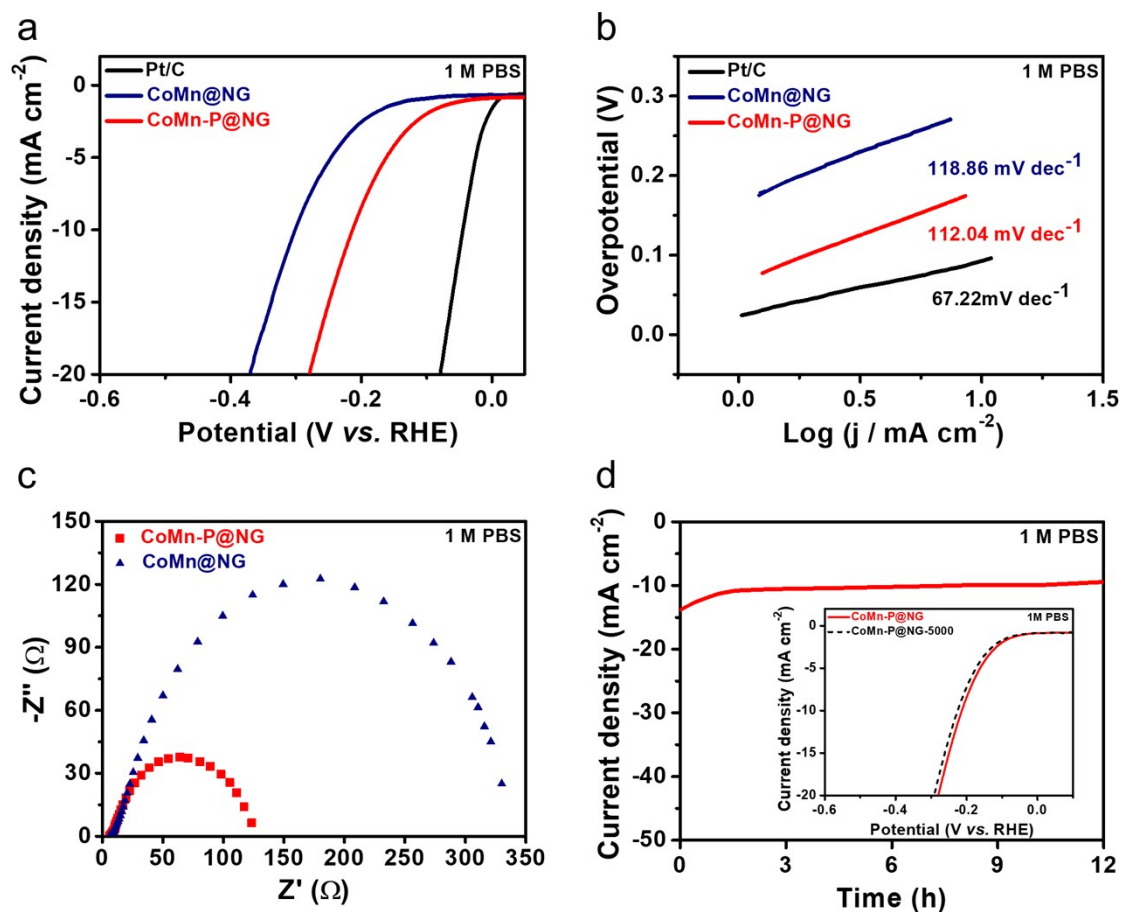

Figure S5 (a) LSV curves of CoMn-P@NG, CoMn@NG and Pt/C catalysts after normalizing the currents to the geometric area in 1 M PBS solution. (b) Tafel plots of CoMn-P@NG, CoMn@NG and Pt/C catalysts calculated from the LSV curves. (c) EIS curves of CoMn-P@NG and CoMn@NG in 1 M PBS. (d) HER stability measurement of CoMn-P@NG in 1 M PBS solution at a current density of 10 mA cm<sup>-2</sup> for 12 h. Inserted LSV curves show the initial and after 5000 ADT CV cycles.

Table S1 HER properties comparison of the similar electrocatalysts in KOH and H<sub>2</sub>SO<sub>4</sub> electrolyte

| Catalysts                                                                 | Electrolyte                         | Overpotential at 10 mA cm <sup>-2</sup> | Tafel (mV dec <sup>-1</sup> ) | Ref.      |
|---------------------------------------------------------------------------|-------------------------------------|-----------------------------------------|-------------------------------|-----------|
| CoMn-P@NG                                                                 | 1M KOH                              | 164 mV                                  | 111                           | This work |
| CoMn-P@NG                                                                 | 0.5M H <sub>2</sub> SO <sub>4</sub> | 140 mV                                  | 65                            | This work |
| CoMn@NG                                                                   | 1M KOH                              | 263 mV                                  | 113                           | This work |
| CoMn@NG                                                                   | 0.5M H <sub>2</sub> SO <sub>4</sub> | 211 mV                                  | 133                           | This work |
| Fe <sub>2</sub> P/CoP                                                     | 0.1M KOH                            | 109 mV                                  | 64                            | s1        |
| FeCo@NG/NCNT                                                              | 1M KOH                              | 332 mV                                  | 110                           | s2        |
| CoS <sub>x</sub> @Cu <sub>2</sub> MoS <sub>4</sub> -MoS <sub>2</sub> /NSG | 0.1M KOH                            | 118 mV                                  | 41                            | s3        |
| CoFe-Se-P                                                                 | 0.5M H <sub>2</sub> SO <sub>4</sub> | 119 mV                                  | 62                            | s4        |
| Co@CN                                                                     | 1M KOH                              | 96 mV                                   | 79                            | s5        |
| (Fe-Co)Se <sub>2</sub> F                                                  | 1M KOH                              | 90 mV                                   | 58.7                          | s6        |
| CoSe <sub>2</sub>                                                         | 1M KOH                              | 124 mV                                  | 96.3                          | s6        |
| FeSe <sub>2</sub>                                                         | 1M KOH                              | 158 mV                                  | 98.6                          | s6        |
| Mo-ZnCoP-3                                                                | 1M KOH                              | 162 mV                                  | 61.1                          | s7        |
| Zn <sub>0.975</sub> Co <sub>0.025</sub> S/CoS <sub>2</sub>                | 1M KOH                              | 152 mV                                  | 108                           | s8        |

### Supplementary References

- [s1] Du Y. X., Chen J., Li L., et al. Core-shell FeCo prussian blue analogue/Ni(OH)<sub>2</sub> derived porous ternary transition metal phosphides connected by graphene for effectively electrocatalytic water splitting. *ACS. Sustain. Chem. Eng.*, 2019, 7(15):13523-13531.
- [s2] Du B., Meng Q. T., Sha J. Q., Li J. S., Facile synthesis of FeCo alloys encapsulated in nitrogen-doped graphite/carbon nanotube hybrids: efficient bi-functional electrocatalysts for oxygen and hydrogen evolution reactions. *New J. Chem.*, 2018, 42(5):3409-3414.
- [s3] Nguyen D. C., Tran D. T., Doan T. L. L., Kim D. H., Kim N. H., Lee J. H. Rational Design of Core@shell Structured CoS<sub>x</sub>@Cu<sub>2</sub>MoS<sub>4</sub> Hybridized MoS<sub>2</sub>/N,S-codoped graphene as advanced electrocatalyst for water splitting and Zn-Air battery. *Adv. Energy Mater.*, 2020, 10(8):1614-1628.
- [s4] He L. H., Cui B. B., Hu B., et al. Mesoporous nanostructured CoFe-Se-P composite derived from a prussian blue analogue as a superior electrocatalyst for efficient overall water splitting. *ACS Appl. Energy Mater.*, 2018, 1(8):3915-3928.
- [s5] Li S. T., Shi G. M., Liang J. S., et al. Core-shell structured Co@CN nanocomposites as highly efficient dual function catalysts for reduction of toxic contaminants and hydrogen evolution reaction. *Nanotechnology*, 2020, 31(6):0957-0969.
- [s6] Zhang W. X., Zhang H., Luo R., Prussian blue analogues-derived bimetallic iron-cobalt selenides for efficient overall water splitting. *J. Colloid Interf. Sci.*, 2019, 548, 48-55.
- [s7] Xie M., Jia K., Lu J. N., Zhao R. D., Bi-functional Mo and P co-doped ZnCo-LDH

nanosheets as high performance electrocatalysts for boosting overall water splitting. *CrystEngComm*, 2020, 22(3):546-553.

[s8] Yu Z., Bai Y., Zhang S. M., Metal-organic framework-derived  $Zn_{0.975}Co_{0.025}S/CoS_2$  embedded in N, S-codoped carbon nanotube/nanopolyhedra as an efficient electrocatalyst for overall water splitting[J]. *J. Mater. Chem. A*, 2018, 6(22):10441-10446.
